# Supplementary material for: Calculating the Social Rhythm Metric (SRM) and Examining Its Use in Interpersonal Social Rhythm Therapy (IPSRT) in a Healthy Population Study
Source: PubMed Central journal article supplement (PMC4219261; doi:10.3390/bs4030265), 2014-08-06
Supplement: behavsci-04-00265-s001.pdf [file behavsci-04-00265-s001.pdf]

Supplemental Materials

Figure S1. Completed diary page (translated from Dutch). For each new activity all questions (A to J) had to be answered.

|                                                                                                                                                                                                                                                        |                                                |                                                                                                                                                                                                                                                                                                                                                                                                                                                                                                                                             |  |
|--------------------------------------------------------------------------------------------------------------------------------------------------------------------------------------------------------------------------------------------------------|------------------------------------------------|---------------------------------------------------------------------------------------------------------------------------------------------------------------------------------------------------------------------------------------------------------------------------------------------------------------------------------------------------------------------------------------------------------------------------------------------------------------------------------------------------------------------------------------------|--|
| <b>A. Activity: (give activity code)</b><br>431 (=eating cold foot)                                                                                                                                                                                    |                                                | <b>H. Presence of others: (encircle 1 answer)</b><br>1. Nobody<br>2. Yes, there was someone else present<br>3. Yes, I did the activity with someone else                                                                                                                                                                                                                                                                                                                                                                                    |  |
| <b>B. Secondary activity: (use activity code)</b><br>920 (=reading newspaper)                                                                                                                                                                          |                                                | <b>I. Spoken with: (encircle – multiple answers possible)</b><br>1. Nobody<br>2. Spouse, partner, ...<br>3. (Own) children with whom you live together<br>4. Parents with whom you live together<br>5. Siblings with whom you live together<br>6. Other members of the household<br>7. Non-resident family members<br>8. Neighbours<br>9. Colleagues, fellow students, ...<br>10. Friends, acquaintances, ...<br>11. People that provide a service<br>12. People to whom you provide a service<br>13. Someone unknown<br>14. Others : ..... |  |
| <b>C. Starting time: 7h30m</b>                                                                                                                                                                                                                         | <b>E. New day: (give dd/mm/yy)</b><br>21/06/04 | <b>J. I did this activity because ... (preferably encircle only 1 answer)</b><br>1. I am required or obliged<br>2. To please others, or out of feelings of duty<br>3. Out of necessity, because it is required before doing something else, because there is no other<br>4. Of the pleasure I derive from doing it                                                                                                                                                                                                                          |  |
| <b>D. Ending time: 7h52m</b>                                                                                                                                                                                                                           |                                                |                                                                                                                                                                                                                                                                                                                                                                                                                                                                                                                                             |  |
| <b>F. Location (encircle 1 answer):</b><br>1. At home (also student dorm or holiday home)<br>2. At work (not at home)<br>3. At someone else's place<br>4. Somewhere else                                                                               |                                                |                                                                                                                                                                                                                                                                                                                                                                                                                                                                                                                                             |  |
| <b>G. In case of transport, by which means? (encircle – multiple answers possible)</b><br>1. By foot<br>2. By bike<br>3. By moped or scooter<br>4. By motorcycle<br>5. By car<br>6. By public transport (bus, tram, metro, train)<br>7. By other means |                                                |                                                                                                                                                                                                                                                                                                                                                                                                                                                                                                                                             |  |
| <b>Comments:</b>                                                                                                                                                                                                                                       |                                                |                                                                                                                                                                                                                                                                                                                                                                                                                                                                                                                                             |  |

Table S1. Varimax rotated component matrix of principal component analysis (sorted) of GHQ-12.

| Item <sup>a,b</sup>                                       | Mental distress | Mental stability |
|-----------------------------------------------------------|-----------------|------------------|
| I lost much sleep over worry                              | <b>0.783</b>    | -0.003           |
| I felt constantly under constrain                         | <b>0.779</b>    | 0.030            |
| I have been feeling unhappy and depressed                 | <b>0.650</b>    | -0.413           |
| I have been loosing confidence in myself                  | <b>0.533</b>    | -0.469           |
| I felt I couldn't overcome my difficulties                | <b>0.516</b>    | -0.474           |
| I felt capable of making decisions about things           | -0.135          | <b>0.709</b>     |
| I have been able to face up to my problems                | 0.145           | <b>0.706</b>     |
| I felt I was playing a useful part in things              | -0.228          | <b>0.635</b>     |
| I have been able to enjoy my normal day-to-day activities | -0.473          | <b>0.470</b>     |
| I have been able to concentrate on what I am doing        | -0.417          | <b>0.466</b>     |
| <i>Eigen value</i>                                        | 3.873           | 1.268            |
| <i>Cronbach's Alpha</i>                                   | 0.757           | 0.691            |

Note: <sup>a</sup> Items were translated to Dutch. <sup>b</sup> Likert-scale ranging from 1 = totally disagree to 5 = totally agree.
